# Supplementary material for: Functional analysis of microRNA and transcription factor synergistic regulatory network based on identifying regulatory motifs in non-small cell lung cancer
Source: Springer Nature journal article supplement (doi:10.1186/1752-0509-7-122), 2013-11-07
Supplement: 12918_2013_1444_MOESM1_ESM.pdf [file 12918_2013_1444_MOESM1_ESM.pdf]

**Supplementary Table S1.** The ratio of overlap genes and original genes after bootstrappings

| sampling ID | overlap percentage | sampling ID | overlap percentage | sampling ID | overlap percentage | sampling ID | overlap percentage | sampling ID | overlap percentage |
|-------------|--------------------|-------------|--------------------|-------------|--------------------|-------------|--------------------|-------------|--------------------|
| 1           | 0.88               | 21          | 0.87               | 41          | 0.796              | 61          | 0.888              | 81          | 0.945              |
| 2           | 0.879              | 22          | 0.909              | 42          | 0.87               | 62          | 0.91               | 82          | 0.878              |
| 3           | 0.91               | 23          | 0.886              | 43          | 0.874              | 63          | 0.875              | 83          | 0.903              |
| 4           | 0.847              | 24          | 0.85               | 44          | 0.938              | 64          | 0.891              | 84          | 0.818              |
| 5           | 0.878              | 25          | 0.892              | 45          | 0.91               | 65          | 0.863              | 85          | 0.822              |
| 6           | 0.88               | 26          | 0.849              | 46          | 0.867              | 66          | 0.887              | 86          | 0.813              |
| 7           | 0.869              | 27          | 0.883              | 47          | 0.851              | 67          | 0.882              | 87          | 0.869              |
| 8           | 0.858              | 28          | 0.89               | 48          | 0.934              | 68          | 0.889              | 88          | 0.909              |
| 9           | 0.863              | 29          | 0.925              | 49          | 0.888              | 69          | 0.897              | 89          | 0.869              |
| 10          | 0.884              | 30          | 0.933              | 50          | 0.848              | 70          | 0.869              | 90          | 0.859              |
| 11          | 0.879              | 31          | 0.86               | 51          | 0.856              | 71          | 0.867              | 91          | 0.904              |
| 12          | 0.878              | 32          | 0.885              | 52          | 0.877              | 72          | 0.873              | 92          | 0.895              |
| 13          | 0.861              | 33          | 0.854              | 53          | 0.852              | 73          | 0.904              | 93          | 0.865              |
| 14          | 0.846              | 34          | 0.914              | 54          | 0.876              | 74          | 0.905              | 94          | 0.858              |
| 15          | 0.873              | 35          | 0.882              | 55          | 0.905              | 75          | 0.887              | 95          | 0.874              |
| 16          | 0.893              | 36          | 0.892              | 56          | 0.839              | 76          | 0.826              | 96          | 0.897              |
| 17          | 0.87               | 37          | 0.872              | 57          | 0.875              | 77          | 0.886              | 97          | 0.887              |
| 18          | 0.887              | 38          | 0.864              | 58          | 0.85               | 78          | 0.872              | 98          | 0.828              |
| 19          | 0.86               | 39          | 0.84               | 59          | 0.95               | 79          | 0.878              | 99          | 0.873              |
| 20          | 0.877              | 40          | 0.878              | 60          | 0.871              | 80          | 0.874              | 100         | 0.907              |

**Supplementary Table S2.** Hub TFs and miRNAs of lung cancer synergistic regulatory network

| Hub TF | Degree | Supported by   | Hub miRNA       | Degree | Supported by   |
|--------|--------|----------------|-----------------|--------|----------------|
| ESR1   | 147    | PMID: 18949413 | hsa-miR-590-3p  | 321    | -              |
| TP53   | 123    | PMID: 12619108 | hsa-miR-548c-3p | 302    | -              |
| E2F3   | 117    | PMID: 16938365 | hsa-miR-570     | 243    | -              |
| MYC    | 116    | PMID: 11720740 | hsa-miR-340     | 242    | -              |
| E2F1   | 111    | PMID: 22803943 | hsa-miR-495     | 218    | -              |
| ETS1   | 109    | PMID: 17785952 | hsa-miR-106a *  | 211    | PMID: 19209007 |
| PPARA  | 88     |                | hsa-miR-20a *   | 204    | PMID: 16266980 |
| STAT1  | 81     |                | hsa-miR-106b *  | 203    | -              |
| SMAD7  | 80     |                | hsa-miR-20b *   | 201    | -              |
| ETS2   | 71     | PMID: 21922129 | hsa-miR-944     | 200    | -              |
|        |        |                | hsa-miR-93      | 199    | -              |
|        |        |                | hsa-miR-548d-3p | 196    | -              |
|        |        |                | hsa-miR-545     | 196    | -              |

\* : belongs to miR-17 family;

Supported by : in which articles the TF or miRNA was experimental verified to related with lung cancer development and progression

**Supplementary Table S3.** Hub miRNAs and TFs of subnetwork I to X.

| Subnetwork      | Hub TF | Degree | Hub miRNA       | Degree |
|-----------------|--------|--------|-----------------|--------|
| I               | E2F1   | 65     | hsa-miR-106a    | 12     |
| II              | ESR1   | 433    | hsa-miR-590-3p  | 42     |
|                 |        |        | hsa-miR-548d-3p | 39     |
|                 |        |        | hsa-miR-548c-3p | 33     |
|                 |        |        | hsa-miR-27b     | 30     |
|                 |        |        | hsa-miR-302a    | 30     |
|                 |        |        | hsa-miR-302d    | 30     |
|                 |        |        | hsa-miR-302b    | 30     |
|                 |        |        | hsa-miR-302c    | 30     |
|                 |        |        | hsa-miR-152     | 30     |
|                 |        |        | hsa-miR-495     | 28     |
| hsa-miR-421     | 28     |        |                 |        |
| III             | MYC    | 195    | hsa-miR-106a    | 37     |
|                 |        |        | TP53            | 55     |
|                 |        |        | hsa-miR-16      | 25     |
|                 |        |        | hsa-miR-34a     | 20     |
| IV              | E2F1   | 1076   | hsa-miR-106a    | 188    |
| V               | E2F1   | 259    | hsa-miR-17      | 44     |
| VI              | MYC    | 2096   | hsa-miR-548c-3p | 389    |
|                 |        |        | TP53            | 1831   |
|                 |        |        | HIF1A           | 1804   |
|                 |        |        | TFAP2A          | 1759   |
|                 |        |        | SP1             | 1506   |
|                 |        |        | JUN             | 1192   |
|                 |        |        | E2F4            | 1172   |
|                 |        |        | STAT1           | 1142   |
|                 |        |        | hsa-miR-548d-3p | 310    |
|                 |        |        | hsa-miR-944     | 306    |
| hsa-miR-548a-3p | 298    |        |                 |        |
| hsa-miR-374a    | 293    |        |                 |        |
| hsa-miR-494     | 277    |        |                 |        |
| hsa-miR-298     | 274    |        |                 |        |
| hsa-miR-579     | 265    |        |                 |        |
| hsa-miR-374b    | 265    |        |                 |        |
| hsa-miR-449b    | 260    |        |                 |        |
| VII             | E2F3   | 14904  | hsa-miR-548c-3p | 3447   |
|                 |        |        | ESR1            | 14040  |
|                 |        |        | hsa-miR-590-3p  | 3357   |
|                 |        |        | hsa-miR-570     | 2090   |
|                 |        |        | hsa-miR-340     | 2081   |
|                 |        |        | hsa-miR-495     | 2052   |
|                 |        |        | hsa-miR-548d-3p | 1996   |
|                 |        |        | hsa-miR-548a-5p | 1635   |
|                 |        |        | hsa-miR-656     | 1570   |
|                 |        |        | hsa-miR-20b     | 1520   |
| hsa-miR-545     | 1485   |        |                 |        |
| hsa-miR-548d-5p | 1463   |        |                 |        |

|      |        |                 |                 |      |
|------|--------|-----------------|-----------------|------|
|      |        |                 | hsa-miR-548c-5p | 1462 |
| VIII | MYC    | 2197            | hsa-miR-129-5p  | 831  |
|      | POU2F1 | 1572            | hsa-miR-429     | 751  |
|      | E2F1   | 1221            | hsa-miR-152     | 676  |
|      |        |                 | hsa-miR-301b    | 674  |
|      |        |                 | hsa-miR-16      | 663  |
| IX   | ESR1   | 2717            | hsa-miR-300     | 196  |
|      | ETS1   | 2506            | hsa-miR-152     | 191  |
|      |        |                 | hsa-miR-940     | 182  |
|      |        |                 | hsa-miR-330-3p  | 173  |
|      |        |                 | hsa-miR-381     | 162  |
|      |        |                 | hsa-miR-150     | 162  |
|      |        |                 | hsa-miR-380     | 157  |
|      |        |                 | hsa-miR-421     | 156  |
|      |        |                 | hsa-miR-642     | 149  |
|      |        |                 | hsa-miR-19a     | 149  |
|      |        | hsa-miR-548d-3p | 144             |      |
|      |        | hsa-miR-338     | 143             |      |
| X    | MYC    | 1357            | hsa-miR-16      | 174  |
|      | TP53   | 561             | hsa-miR-92a     | 173  |
|      | E2F1   | 554             | hsa-miR-34c-5p  | 167  |
|      |        |                 | hsa-miR-34a     | 165  |
|      |        | hsa-miR-106a    | 151             |      |

**Supplementary Table S4.1** The count of motif types (subnetworks) miRNAs belong to.

| miRNA      | *  | miRNA      | * | miRNA       | * | miRNA       | * |
|------------|----|------------|---|-------------|---|-------------|---|
| miR-381    | 10 | miR-200b   | 6 | miR-297     | 4 | miR-619     | 4 |
| miR-106a   | 10 | miR-200c   | 6 | miR-488     | 4 | miR-30b     | 4 |
| miR-20a    | 10 | miR-330-3p | 6 | miR-181b    | 4 | miR-503     | 4 |
| miR-17     | 10 | miR-940    | 6 | miR-181a    | 4 | miR-588     | 4 |
| miR-19b    | 10 | miR-657    | 6 | miR-593     | 4 | miR-30d     | 4 |
| miR-21     | 10 | miR-421    | 6 | miR-450b-5p | 4 | miR-30a     | 4 |
| miR-221    | 10 | miR-511    | 6 | miR-892a    | 4 | miR-767-5p  | 4 |
| miR-219-5p | 9  | miR-101    | 6 | miR-494     | 4 | miR-595     | 4 |
| miR-16     | 9  | miR-608    | 6 | miR-377     | 4 | miR-30c     | 4 |
| miR-106b   | 7  | miR-1254   | 6 | miR-1265    | 4 | miR-30e     | 4 |
| miR-20b    | 7  | miR-646    | 6 | miR-507     | 4 | miR-188-5p  | 4 |
| miR-222    | 7  | miR-153    | 6 | miR-571     | 4 | miR-519b-5p | 4 |
| miR-338-3p | 7  | miR-590-5p | 6 | miR-181c    | 4 | miR-519c-5p | 4 |
| miR-484    | 7  | miR-328    | 6 | miR-577     | 4 | miR-548d-5p | 4 |
| miR-429    | 7  | miR-633    | 6 | miR-575     | 4 | miR-559     | 4 |
| miR-590-3p | 7  | miR-200a   | 6 | miR-548a-5p | 4 | miR-301a    | 4 |

|             |   |             |   |             |   |               |   |
|-------------|---|-------------|---|-------------|---|---------------|---|
| miR-647     | 7 | miR-1291    | 6 | miR-340     | 4 | miR-548c-5p   | 4 |
| miR-92a     | 7 | miR-142-5p  | 6 | miR-150     | 4 | miR-133a      | 4 |
| miR-199a-5p | 7 | miR-34c-5p  | 6 | miR-148b    | 4 | miR-133b      | 4 |
| miR-203     | 7 | miR-137     | 6 | miR-148a    | 4 | miR-370       | 4 |
| miR-300     | 7 | miR-208b    | 6 | miR-205     | 4 | miR-320a      | 4 |
| miR-338-5p  | 7 | miR-134     | 5 | miR-545     | 4 | miR-10b       | 4 |
| miR-433     | 7 | miR-1279    | 5 | miR-149     | 4 | miR-320b      | 4 |
| miR-302a    | 7 | miR-489     | 4 | miR-103     | 4 | miR-320c      | 4 |
| miR-302d    | 7 | miR-515-5p  | 4 | miR-454     | 4 | miR-320d      | 4 |
| miR-302b    | 7 | miR-548c-3p | 4 | miR-512-3p  | 4 | miR-509-3-5p  | 4 |
| miR-302c    | 7 | miR-369-3p  | 4 | miR-204     | 4 | miR-509-5p    | 4 |
| miR-372     | 7 | miR-625     | 4 | miR-211     | 4 | miR-876-5p    | 4 |
| miR-519d    | 7 | miR-495     | 4 | miR-767-3p  | 4 | miR-605       | 4 |
| miR-199a-3p | 7 | miR-512-5p  | 4 | miR-603     | 4 | miR-548l      | 4 |
| miR-568     | 7 | miR-944     | 4 | miR-513a-3p | 4 | miR-449b      | 4 |
| miR-9       | 7 | miR-656     | 4 | miR-548n    | 4 | miR-624       | 4 |
| miR-199b-3p | 7 | miR-544     | 4 | miR-561     | 4 | miR-33a       | 4 |
| miR-129-5p  | 7 | miR-524-5p  | 4 | miR-510     | 4 | miR-33b       | 4 |
| miR-329     | 7 | miR-570     | 4 | miR-15b     | 4 | miR-648       | 4 |
| miR-548a-3p | 7 | miR-520d-5p | 4 | miR-576-3p  | 4 | miR-212       | 4 |
| miR-152     | 7 | miR-548d-3p | 4 | miR-522     | 4 | miR-194       | 4 |
| miR-18b     | 7 | let-7d      | 4 | miR-424     | 4 | miR-591       | 4 |
| miR-107     | 7 | miR-650     | 4 | miR-374b    | 4 | miR-935       | 4 |
| miR-145     | 7 | miR-493     | 4 | miR-96      | 4 | miR-618       | 3 |
| miR-18a     | 7 | miR-92b     | 4 | miR-374a    | 4 | miR-628-5p    | 3 |
| miR-223     | 7 | miR-520h    | 4 | miR-491-3p  | 4 | miR-566       | 3 |
| miR-671-5p  | 7 | miR-766     | 4 | miR-497     | 4 | miR-539       | 3 |
| miR-195     | 7 | miR-520g    | 4 | miR-573     | 4 | miR-1226      | 3 |
| miR-19a     | 7 | miR-622     | 4 | miR-218     | 4 | miR-499-3p    | 3 |
| miR-15a     | 7 | miR-27a     | 4 | miR-217     | 4 | miR-542-5p    | 3 |
| miR-558     | 7 | miR-27b     | 4 | miR-130b    | 4 | miR-604       | 3 |
| miR-34a     | 7 | miR-144     | 4 | miR-409-3p  | 4 | miR-32        | 3 |
| miR-301b    | 7 | miR-380     | 4 | miR-130a    | 4 | miR-128       | 3 |
| miR-26a     | 7 | let-7i      | 4 | miR-26b     | 4 | miR-548k      | 3 |
| miR-423-5p  | 7 | let-7e      | 4 | miR-410     | 4 | miR-1237      | 3 |
| miR-634     | 7 | let-7c      | 4 | miR-641     | 4 | miR-651       | 3 |
| miR-361-5p  | 7 | let-7b      | 4 | miR-543     | 4 | miR-708       | 3 |
| miR-141     | 7 | miR-298     | 4 | miR-578     | 4 | miR-1184      | 3 |
| miR-448     | 7 | miR-520b    | 4 | miR-581     | 4 | miR-1183      | 3 |
| miR-548b-5p | 7 | miR-520e    | 4 | miR-659     | 4 | miR-621       | 3 |
| miR-582-5p  | 7 | miR-520a-3p | 4 | miR-542-3p  | 4 | miR-208a      | 3 |
| miR-299-5p  | 7 | miR-583     | 4 | miR-642     | 4 | miR-376a_star | 3 |
| miR-25      | 7 | miR-519a    | 4 | miR-518a-5p | 4 | miR-30e-3p    | 3 |
| miR-363     | 7 | miR-519c-3p | 4 | miR-7       | 4 | miR-34c       | 2 |

|         |   |             |   |         |   |              |   |
|---------|---|-------------|---|---------|---|--------------|---|
| miR-557 | 7 | miR-519b-3p | 4 | miR-182 | 4 | miR-375      | 1 |
| miR-132 | 7 | miR-579     | 4 | miR-31  | 4 | miR-183      | 1 |
| miR-93  | 6 | miR-888     | 4 | miR-527 | 4 | miR-191_star | 1 |

**Supplementary Table S4.2** The count of motif types (subnetworks) TFs belong to.

| TF     | *  | TF      | * | TF     | * | TF      | * |
|--------|----|---------|---|--------|---|---------|---|
| STAT1  | 10 | PAX5    | 4 | HOXA10 | 1 | NFAT1   | 1 |
| E2F1   | 10 | STAT3   | 4 | ZFP161 | 1 | GATA6   | 1 |
| ESR1   | 10 | FOS     | 4 | PITX3  | 1 | HOXC11  | 1 |
| E2F3   | 8  | NFIC    | 4 | ETV4   | 1 | R1      | 1 |
| TP53   | 7  | CEBPB   | 4 | RARA   | 1 | NFAT5   | 1 |
| JUNB   | 6  | HNF1A   | 4 | VDR    | 1 | K3      | 1 |
| ETS1   | 4  | MEF2A   | 4 | RARG   | 1 | NFAT    | 1 |
| FLI1   | 4  | CREB1   | 4 | PEG10  | 1 | EGR4    | 1 |
| PGR    | 4  | ATF2    | 4 | NFIA   | 1 | CBFB    | 1 |
| RELA   | 4  | STAT5B  | 4 | HIF1   | 1 | CTNBL1  | 1 |
| AHR    | 4  | NFE2L1  | 4 | M2     | 1 | GAS     | 1 |
| PPARG  | 4  | ZEB1    | 3 | MEF3   | 1 | KLF16   | 1 |
| SMAD7  | 4  | BACH1   | 3 | HLF    | 1 | SMAD2   | 1 |
| WT1    | 4  | FOXO3   | 3 | AR     | 1 | PAX8    | 1 |
| PPARA  | 4  | HMGA1   | 3 | GATA4  | 1 | PKNOX1  | 1 |
| ETS2   | 4  | FOSL1   | 3 | GABPA  | 1 | PBX2    | 1 |
| BRCA1  | 4  | JUND    | 3 | SCRT1  | 1 | ATF4    | 1 |
| MYBL2  | 4  | NR2F1   | 3 | USF1   | 1 | ZNF76   | 1 |
| ARNT   | 4  | NR2F2   | 3 | USF2   | 1 | ZNF143  | 1 |
| XRCC5  | 4  | NFYA    | 3 | PHOX2A | 1 | BRF3    | 1 |
| NFE2L2 | 4  | NFYB    | 3 | SNAI2  | 1 | BRF4    | 1 |
| MAFG   | 4  | HSF1    | 3 | HOXA5  | 1 | RUNX2   | 1 |
| MYC    | 4  | HSF2    | 3 | ERG    | 1 | MXD1    | 1 |
| POU2F1 | 4  | EP300   | 3 | MTF1   | 1 | NAT10   | 1 |
| EGR1   | 4  | TOPORS  | 3 | ZNF195 | 1 | TBPL1   | 1 |
| CEBPA  | 4  | POU5F1  | 3 | PPARD  | 1 | TFDP1   | 1 |
| TFAP2A | 4  | XRCC6   | 3 | CEBPD  | 1 | DP1     | 1 |
| HIF1A  | 4  | NFYC    | 3 | SP2    | 1 | NR5A2   | 1 |
| NR3C1  | 4  | SREBF1  | 3 | HOXD9  | 1 | SF1     | 1 |
| E2F4   | 4  | NR2E1   | 3 | ZFH1B  | 1 | NFKB2   | 1 |
| SP1    | 4  | TLX1    | 3 | HOXA7  | 1 | THRB    | 1 |
| SOX2   | 4  | TP53BP1 | 2 | MZF1   | 1 | THRA    | 1 |
| SPI1   | 4  | RPA1    | 2 | NR1I2  | 1 | NEUROD1 | 1 |
| JUN    | 4  | BRCA2   | 2 | ATF1   | 1 | IL17RD  | 1 |
| NFKB1  | 4  | FUBP1   | 2 | TFAP2B | 1 | TFCP2   | 1 |
| HNF4A  | 4  | ESR2    | 1 | SMAD4  | 1 | PAX3    | 1 |
| STAT5A | 4  | RARB    | 1 | OTX1   | 1 | LHX2    | 1 |
| LEF1   | 4  | HNF4G   | 1 | ATF3   | 1 | DLX3    | 1 |
| MYB    | 4  | SP3     | 1 | MBD2   | 1 | ETV5    | 1 |

|        |   |              |   |        |   |        |   |
|--------|---|--------------|---|--------|---|--------|---|
| RFX1   | 4 | FOXA2        | 1 | ZNF148 | 1 | GABPB2 | 1 |
| STAT6  | 4 | FOXA1        | 1 | NR2F6  | 1 | ZNF350 | 1 |
| POU3F2 | 4 | LOC100130009 | 1 | NFAT2  | 1 |        |   |

\*: The number of motif types (subnetworks) miRNAs or TFs belong to.

**Supplementary Table S5.** Specific functions of miRNA-TF regulatory subnetwork I to X.

**Table S5.1** Specific functions of Subnetwork I

***DNA replication***

GO:0006260 DNA replication

**Table S5.2** Specific functions of Subnetwork II

***Regulation of RNA/protein metabolic process***

GO:0051252 regulation of RNA metabolic process  
 GO:0032270 positive regulation of cellular protein metabolic process  
 GO:0051247 positive regulation of protein metabolic process  
 GO:0045937 positive regulation of phosphate metabolic process

***Regulation of protein modification***

GO:0001934 positive regulation of protein phosphorylation  
 GO:0031401 positive regulation of protein modification process  
 GO:0042327 positive regulation of phosphorylation

***Regulation of gene expression and DNA transcription***

GO:0010629 negative regulation of gene expression  
 GO:0045892 negative regulation of transcription,DNA-dependent

***Regulation of kinase activity***

GO:0033674 positive regulation of kinase activity  
 GO:0045737 positive regulation of cyclin-dependent protein kinase activity  
 GO:0045860 positive regulation of protein kinase activity  
 GO:0051347 positive regulation of transferase activity  
 GO:0071902 positive regulation of protein serine/threonine kinase activity  
 GO:0000079 regulation of cyclin-dependent protein kinase activity

***Response to UV-A***

GO:0070141 response to UV-A

***Regulation of cell migration***

GO:0030334 regulation of cell migration  
 GO:2000147 positive regulation of cell motility

***Regulation of programmed cell death***

GO:0043068 positive regulation of programmed cell death  
 GO:0012502 induction of programmed cell death  
 GO:0006916 anti-apoptosis  
 GO:0006917 induction of apoptosis

***Regulation or activation of Lymphocyte or T cell***

GO:0031295 T cell costimulation  
 GO:0050863 regulation of T cell activation  
 GO:0050870 positive regulation of T cell activation

---

|            |                                              |
|------------|----------------------------------------------|
| GO:0051249 | regulation of lymphocyte activation          |
| GO:0051251 | positive regulation of lymphocyte activation |

---

**Table S5.3** Specific functions of Subnetwork III

---

|                                                                   |                                                                 |
|-------------------------------------------------------------------|-----------------------------------------------------------------|
| <b><i>Regulation of programmed cell death</i></b>                 |                                                                 |
| GO:0043068                                                        | positive regulation of programmed cell death                    |
| GO:0012502                                                        | induction of programmed cell death                              |
| GO:0006917                                                        | induction of apoptosis                                          |
| <b><i>Regulation of RNA/protein metabolic process</i></b>         |                                                                 |
| GO:0051252                                                        | regulation of RNA metabolic process                             |
| GO:0051247                                                        | positive regulation of protein metabolic process                |
| GO:0016070                                                        | RNA metabolic process                                           |
| GO:0032269                                                        | negative regulation of cellular protein metabolic process       |
| GO:0051248                                                        | negative regulation of protein metabolic process                |
| GO:0042176                                                        | regulation of protein catabolic process                         |
| <b><i>Regulation of transferase activity</i></b>                  |                                                                 |
| GO:0051348                                                        | negative regulation of transferase activity                     |
| GO:0033673                                                        | negative regulation of kinase activity                          |
| GO:0006469                                                        | negative regulation of protein kinase activity                  |
| GO:0033674                                                        | positive regulation of kinase activity                          |
| GO:0045860                                                        | positive regulation of protein kinase activity                  |
| GO:0051347                                                        | positive regulation of transferase activity                     |
| GO:0071901                                                        | negative regulation of protein serine/threonine kinase activity |
| <b><i>Immune response</i></b>                                     |                                                                 |
| GO:0002253                                                        | activation of immune response                                   |
| GO:0002757                                                        | immune response-activating signal transduction                  |
| <b><i>Regulation of gene expression and DNA transcription</i></b> |                                                                 |
| GO:0010629                                                        | negative regulation of gene expression                          |
| GO:0045892                                                        | negative regulation of transcription, DNA-dependent             |

---

**Table S5.4** Specific functions of Subnetwork IV

---

|                                                                            |                                                |
|----------------------------------------------------------------------------|------------------------------------------------|
| <b><i>Inositol lipid-mediated signaling</i></b>                            |                                                |
| GO:0048015                                                                 | phosphatidylinositol-mediated signaling        |
| GO:0048017                                                                 | inositol lipid-mediated signaling              |
| <b><i>Regulation of protein kinase/transferase/ hydrolase activity</i></b> |                                                |
| GO:0006469                                                                 | negative regulation of protein kinase activity |
| GO:0033673                                                                 | negative regulation of kinase activity         |
| GO:0045860                                                                 | positive regulation of protein kinase activity |
| GO:0051348                                                                 | negative regulation of transferase activity    |
| GO:0033674                                                                 | positive regulation of kinase activity         |
| GO:0051347                                                                 | positive regulation of transferase activity    |
| GO:0032147                                                                 | activation of protein kinase activity          |
| GO:0043405                                                                 | activation of MAP kinase activity              |
| GO:0051345                                                                 | positive regulation of hydrolase activity      |

GO:0061097 regulation of protein tyrosine kinase activity  
GO:0071901 negative regulation of protein serine/threonine kinase activity  
GO:0071902 positive regulation of protein serine/threonine kinase activity

***Receptor signaling pathway***

GO:0007173 epidermal growth factor receptor signaling pathway  
GO:0007179 transforming growth factor beta receptor signaling pathway  
GO:0008543 fibroblast growth factor receptor signaling pathway  
GO:0002221 pattern recognition receptor signaling pathway  
GO:0002429 immune response-activating cell surface receptor signaling pathway  
GO:0002755 MyD88-dependent toll-like receptor signaling pathway  
GO:0002768 immune response-regulating cell surface receptor signaling pathway  
GO:0017015 regulation of transforming growth factor beta receptor signaling pathway  
GO:0060070 canonical Wnt receptor signaling pathway

***Kinase (signaling) cascade***

GO:0007243 intracellular protein kinase cascade  
GO:0000165 MAPKKK cascade  
GO:0043408 regulation of MAPKKK cascade  
GO:0010740 positive regulation of intracellular protein kinase cascade  
GO:0010741 negative regulation of intracellular protein kinase cascade  
GO:0043409 negative regulation of MAPKKK cascade  
GO:0043410 positive regulation of MAPKKK cascade  
GO:0007254 JNK cascade  
GO:0046328 regulation of JNK cascade  
GO:0046330 positive regulation of JNK cascade  
GO:0070302 regulation of stress-activated protein kinase signaling cascade  
GO:0070304 positive regulation of stress-activated protein kinase signaling cascade

***Induction of apoptosis or programmed cell death***

GO:0006917 induction of apoptosis  
GO:0008624 induction of apoptosis by extracellular signals  
GO:0012502 induction of programmed cell death  
GO:0043068 positive regulation of programmed cell death

***Regulation of phosphorylation***

GO:0042327 positive regulation of phosphorylation  
GO:0001934 positive regulation of protein phosphorylation  
GO:0018108 peptidyl-tyrosine phosphorylation  
GO:0001933 negative regulation of protein phosphorylation  
GO:0042326 negative regulation of phosphorylation  
GO:0006470 protein dephosphorylation

***Regulation of protein/phosphate catabolic process***

GO:0042176 regulation of protein catabolic process  
GO:0045732 positive regulation of protein catabolic process  
GO:0045936 negative regulation of phosphate metabolic process  
GO:0045937 positive regulation of phosphate metabolic process

***Heart development***



|                                                      |                                                       |
|------------------------------------------------------|-------------------------------------------------------|
| GO:0007507                                           | heart development                                     |
| <b><i>Immune response</i></b>                        |                                                       |
| GO:0002757                                           | immune response-activating signal transduction        |
| GO:0002758                                           | innate immune response-activating signal transduction |
| GO:0045089                                           | positive regulation of innate immune response         |
| <b><i>Neuron differentiation and development</i></b> |                                                       |
| GO:0030182                                           | neuron differentiation                                |
| GO:0048666                                           | neuron development                                    |
| <b><i>Response to insulin stimulus</i></b>           |                                                       |
| GO:0032868                                           | response to insulin stimulus                          |
| GO:0032869                                           | cellular response to insulin stimulus                 |

---

**Table S5.5** Specific functions of Subnetwork V

|                                                               |                                                                          |
|---------------------------------------------------------------|--------------------------------------------------------------------------|
| <b><i>Anti-apoptosis</i></b>                                  |                                                                          |
| GO:0006916                                                    | anti-apoptosis                                                           |
| GO:0006917                                                    | induction of apoptosis                                                   |
| GO:0012502                                                    | induction of programmed cell death                                       |
| <b><i>Regulation of transcription and gene expression</i></b> |                                                                          |
| GO:0000122                                                    | negative regulation of transcription from RNA polymerase II promoter     |
| GO:0045944                                                    | positive regulation of transcription from RNA polymerase II promoter     |
| GO:0000083                                                    | regulation of transcription involved in G1/S phase of mitotic cell cycle |
| GO:0010628                                                    | positive regulation of gene expression                                   |
| <b><i>DNA replication</i></b>                                 |                                                                          |
| GO:0006260                                                    | DNA replication                                                          |
| GO:0006261                                                    | DNA-dependent DNA replication                                            |
| GO:0006271                                                    | DNA strand elongation involved in DNA replication                        |
| GO:0022616                                                    | DNA strand elongation                                                    |
| <b><i>DNA damage repair</i></b>                               |                                                                          |
| GO:0006284                                                    | base-excision repair                                                     |
| GO:0006298                                                    | mismatch repair                                                          |
| GO:0006302                                                    | double-strand break repair                                               |
| GO:0000077                                                    | DNA damage checkpoint                                                    |
| GO:0042770                                                    | signal transduction in response to DNA damage                            |
| GO:0030330                                                    | DNA damage response, signal transduction by p53 class mediator           |
| <b><i>Telomere maintenance and organization</i></b>           |                                                                          |
| GO:0010833                                                    | telomere maintenance via telomere lengthening                            |
| GO:0000722                                                    | telomere maintenance via recombination                                   |
| GO:0000723                                                    | telomere maintenance                                                     |
| GO:0032200                                                    | telomere organization                                                    |
| GO:0032201                                                    | telomere maintenance via semi-conservative replication                   |
| <b><i>Amino acid/purine nucleotide metabolic process</i></b>  |                                                                          |
| GO:0006520                                                    | cellular amino acid metabolic process                                    |
| GO:0006575                                                    | cellular modified amino acid metabolic process                           |
| GO:0006163                                                    | purine nucleotide metabolic process                                      |

GO:0006195 purine nucleotide catabolic process  
GO:0009166 nucleotide catabolic process  
GO:0045937 positive regulation of phosphate metabolic process  
GO:0032270 positive regulation of cellular protein metabolic process

***Regulation of hydrolase/protein kinase activity***

GO:0051345 positive regulation of hydrolase activity  
GO:0000079 regulation of cyclin-dependent protein kinase activity  
GO:0043405 regulation of MAP kinase activity  
GO:0033674 positive regulation of kinase activity  
GO:0045737 positive regulation of cyclin-dependent protein kinase activity  
GO:0045860 positive regulation of protein kinase activity  
GO:0050999 regulation of nitric-oxide synthase activity  
GO:0051347 positive regulation of transferase activity  
GO:0071902 positive regulation of protein serine/threonine kinase activity  
GO:0002696 positive regulation of leukocyte activation

***Regulation of cell migration***

GO:0030334 regulation of cell migration  
GO:2000147 positive regulation of cell motility

***Response to insulin stimulus***

GO:0032868 response to insulin stimulus  
GO:0032869 cellular response to insulin stimulus

---

**Table S5.6** Specific functions of Subnetwork VI

---

***Regulation of RNA/protein metabolic process***

GO:0051252 regulation of RNA metabolic process  
GO:0045937 positive regulation of phosphate metabolic process  
GO:0032270 positive regulation of cellular protein metabolic process  
GO:0042176 regulation of protein catabolic process  
GO:0051247 positive regulation of protein metabolic process

***Regulation of programmed cell death or apoptosis***

GO:0043068 positive regulation of programmed cell death  
GO:0006917 induction of apoptosis  
GO:0012502 induction of programmed cell death  
GO:0006916 anti-apoptosis  
GO:0090068 positive regulation of cell cycle process

***Regulation of cell migration***

GO:0030334 regulation of cell migration  
GO:2000147 positive regulation of cell motility  
GO:0030335 positive regulation of cell migration

***Regulation of hydrolase/kinase activity***

GO:0051345 positive regulation of hydrolase activity  
GO:0033674 positive regulation of kinase activity  
GO:0051347 positive regulation of transferase activity  
GO:0045860 positive regulation of protein kinase activity

---

---

|                                                                                         |                                                                 |
|-----------------------------------------------------------------------------------------|-----------------------------------------------------------------|
| GO:0000079                                                                              | regulation of cyclin-dependent protein kinase activity          |
| GO:0071902                                                                              | positive regulation of protein serine/threonine kinase activity |
| GO:0051348                                                                              | negative regulation of transferase activity                     |
| GO:0045737                                                                              | positive regulation of cyclin-dependent protein kinase activity |
| GO:0033673                                                                              | negative regulation of kinase activity                          |
| GO:0006469                                                                              | negative regulation of protein kinase activity                  |
| <b><i>Neuron generation, differentiation and development and cell morphogenesis</i></b> |                                                                 |
| GO:0048699                                                                              | generation of neurons                                           |
| GO:0030182                                                                              | neuron differentiation                                          |
| GO:0048666                                                                              | neuron development                                              |
| GO:0007409                                                                              | axonogenesis                                                    |
| GO:0048667                                                                              | cell morphogenesis involved in neuron differentiation           |
| GO:0048812                                                                              | neuron projection morphogenesis                                 |
| GO:0007411                                                                              | axon guidance                                                   |
| GO:0000904                                                                              | cell morphogenesis involved in differentiation                  |
| GO:0048858                                                                              | cell projection morphogenesis                                   |
| GO:0031175                                                                              | neuron projection development                                   |
| <b><i>Protein modification</i></b>                                                      |                                                                 |
| GO:0031401                                                                              | positive regulation of protein modification process             |
| GO:0001934                                                                              | positive regulation of protein phosphorylation                  |
| GO:0018193                                                                              | peptidyl-amino acid modification                                |

---

**Table S5.7** Specific functions of Subnetwork VII

---

|                                                                                |                                                                          |
|--------------------------------------------------------------------------------|--------------------------------------------------------------------------|
| <b><i>Fibroblast growth factor signaling pathway and cellular response</i></b> |                                                                          |
| GO:0008543                                                                     | fibroblast growth factor receptor signaling pathway                      |
| GO:0044344                                                                     | cellular response to fibroblast growth factor stimulus                   |
| <b><i>Inositol lipid-mediated signaling</i></b>                                |                                                                          |
| GO:0048017                                                                     | inositol lipid-mediated signaling                                        |
| <b><i>Response to insulin stimulus</i></b>                                     |                                                                          |
| GO:0032869                                                                     | cellular response to insulin stimulus                                    |
| GO:0032868                                                                     | response to insulin stimulus                                             |
| <b><i>Regulation of MAPK cascade</i></b>                                       |                                                                          |
| GO:0007243                                                                     | intracellular protein kinase cascade                                     |
| GO:0010741                                                                     | negative regulation of intracellular protein kinase cascade              |
| GO:0043408                                                                     | regulation of MAPKKK cascade                                             |
| GO:0043410                                                                     | positive regulation of MAPKKK cascade                                    |
| GO:0043409                                                                     | negative regulation of MAPKKK cascade                                    |
| GO:0051403                                                                     | stress-activated MAPK cascade                                            |
| GO:0000165                                                                     | MAPKKK cascade                                                           |
| <b><i>Regulation of receptor signaling pathway</i></b>                         |                                                                          |
| GO:0007178                                                                     | transmembrane receptor protein serine/threonine kinase signaling pathway |
| GO:0007173                                                                     | epidermal growth factor receptor signaling pathway                       |
| GO:0008286                                                                     | insulin receptor signaling pathway                                       |
| GO:0060828                                                                     | regulation of canonical Wnt receptor signaling pathway                   |

GO:0007179 transforming growth factor beta receptor signaling pathway  
GO:0060070 canonical Wnt receptor signaling pathway  
GO:0030177 positive regulation of Wnt receptor signaling pathway  
GO:0090263 positive regulation of canonical Wnt receptor signaling pathway

***Regulation of cell migration***

GO:0030334 regulation of cell migration  
GO:0010594 regulation of endothelial cell migration

***Regulation of DNA replication and metabolic***

GO:0006275 regulation of DNA replication  
GO:0051054 positive regulation of DNA metabolic process

***Regulation of phosphorylation***

GO:0045937 positive regulation of phosphate metabolic process  
GO:0042327 positive regulation of phosphorylation  
GO:0001934 positive regulation of protein phosphorylation  
GO:0018108 peptidyl-tyrosine phosphorylation  
GO:0042326 negative regulation of phosphorylation  
GO:0001933 negative regulation of protein phosphorylation

***Regulation of enzymatic activity***

GO:0051348 negative regulation of transferase activity  
GO:0000079 regulation of cyclin-dependent protein kinase activity  
GO:0051347 positive regulation of transferase activity  
GO:0006469 negative regulation of protein kinase activity  
GO:0033674 positive regulation of kinase activity  
GO:0033673 negative regulation of kinase activity  
GO:0045860 positive regulation of protein kinase activity  
GO:0071901 negative regulation of protein serine/threonine kinase activity  
GO:0051345 positive regulation of hydrolase activity  
GO:0000186 activation of MAPKK activity  
GO:0043087 regulation of GTPase activity  
GO:0032318 regulation of Ras GTPase activity

***Regulation of meiosis***

GO:0007126 meiosis  
GO:0007088 regulation of mitosis  
GO:0051327 M phase of meiotic cell cycle  
GO:0007131 reciprocal meiotic recombination  
GO:0007127 meiosis I

---

**Table S5.8** Specific functions of Subnetwork VIII

***Intracellular protein kinase cascade***

GO:0007243 intracellular protein kinase cascade  
GO:0010741 negative regulation of intracellular protein kinase cascade

***Growth factor receptor signaling pathway***

GO:0007173 epidermal growth factor receptor signaling pathway  
GO:0008543 fibroblast growth factor receptor signaling pathway

GO:0008286 insulin receptor signaling pathway  
GO:0060828 regulation of canonical Wnt receptor signaling pathway  
GO:0007179 transforming growth factor beta receptor signaling pathway  
GO:0050852 T cell receptor signaling pathway

***Response to stimulus***

GO:0032869 cellular response to insulin stimulus  
GO:0032868 response to insulin stimulus  
GO:0044344 cellular response to fibroblast growth factor stimulus  
GO:0071375 cellular response to peptide hormone stimulus

***Regulation of phosphorylation***

GO:0001934 positive regulation of protein phosphorylation  
GO:0042327 positive regulation of phosphorylation  
GO:0045937 positive regulation of phosphate metabolic process  
GO:0031401 positive regulation of protein modification process  
GO:0018108 peptidyl-tyrosine phosphorylation

***MAPKKK cascade***

GO:0000165 MAPKKK cascade  
GO:0043408 regulation of MAPKKK cascade

***Regulation of cell migration***

GO:0030334 regulation of cell migration  
GO:0010594 regulation of endothelial cell migration  
GO:2000147 positive regulation of cell motility  
GO:0030335 positive regulation of cell migration

***Regulation of kinase activity***

GO:0033674 positive regulation of kinase activity  
GO:0051347 positive regulation of transferase activity  
GO:0051348 negative regulation of transferase activity  
GO:0000079 regulation of cyclin-dependent protein kinase activity  
GO:0045860 positive regulation of protein kinase activity  
GO:0006469 negative regulation of protein kinase activity  
GO:0033673 negative regulation of kinase activity

***Protein stabilization***

GO:0031647 regulation of protein stability  
GO:0050821 protein stabilization

***Immune response***

GO:0002253 activation of immune response  
GO:0002429 immune response-activating cell surface receptor signaling pathway  
GO:0031295 T cell costimulation  
GO:0002521 leukocyte differentiation

---

**Table S5.9** Specific functions of Subnetwork IX

***Regulation of protein metabolic process***

GO:0051247 positive regulation of protein metabolic process  
GO:0032270 positive regulation of cellular protein metabolic process

***Regulation of gene expression and transcription factor activity***

- GO:0010628 positive regulation of gene expression
- GO:0045944 positive regulation of transcription from RNA polymerase II promoter
- GO:0045892 negative regulation of transcription, DNA-dependent
- GO:0010629 negative regulation of gene expression
- GO:0045944 positive regulation of sequence-specific DNA binding transcription factor activity
- GO:0051091 activity
- GO:0051090 regulation of sequence-specific DNA binding transcription factor activity

***Regulation of kinase activity***

- GO:0045860 positive regulation of protein kinase activity
- GO:0033674 positive regulation of kinase activity
- GO:0051347 positive regulation of transferase activity

***Apoptosis or programmed cell death***

- GO:0006917 induction of apoptosis
- GO:0012502 induction of programmed cell death
- GO:0006916 anti-apoptosis
- GO:0043068 positive regulation of programmed cell death
- GO:0043281 regulation of cysteine-type endopeptidase activity involved in apoptotic process
- GO:0043280 positive regulation of cysteine-type endopeptidase activity involved in apoptotic process
- GO:0008624 induction of apoptosis by extracellular signals

***Regulation of protein modification process***

- GO:0031401 positive regulation of protein modification process
- GO:0042327 positive regulation of phosphorylation
- GO:0001934 positive regulation of protein phosphorylation

***Regulation of cell migration***

- GO:0030334 regulation of cell migration
- GO:2000147 positive regulation of cell motility
- GO:0030335 positive regulation of cell migration
- GO:0010594 regulation of endothelial cell migration
- GO:0010595 positive regulation of endothelial cell migration

***Enzyme activity***

- GO:0051345 positive regulation of hydrolase activity
- GO:0000079 regulation of cyclin-dependent protein kinase activity
- GO:0071902 positive regulation of protein serine/threonine kinase activity
- GO:0052547 regulation of peptidase activity
- GO:0052548 regulation of endopeptidase activity
- GO:0006919 activation of caspase activity
- GO:0010950 positive regulation of endopeptidase activity
- GO:0010952 positive regulation of peptidase activity

***Platelet activation***

- GO:0030168 platelet activation

***Regulation of kinase cascade***

GO:0010740 positive regulation of intracellular protein kinase cascade  
 GO:0007243 intracellular protein kinase cascade  
 GO:0000165 MAPKKK cascade  
 GO:0043123 positive regulation of I-kappaB kinase/NF-kappaB cascade  
 GO:0043122 regulation of I-kappaB kinase/NF-kappaB cascade

***regulation of lymphocyte activation***

GO:0002521 leukocyte differentiation  
 GO:0051249 regulation of lymphocyte activation  
 GO:0002696 positive regulation of leukocyte activation  
 GO:0051251 positive regulation of lymphocyte activation  
 GO:0031295 T cell costimulation  
 GO:0050870 positive regulation of T cell activation  
 GO:0050863 regulation of T cell activation

***Regulation of mitotic cell cycle***

GO:0000077 DNA damage checkpoint  
 GO:0006289 nucleotide-excision repair  
 GO:0090068 positive regulation of cell cycle process  
 GO:0007050 cell cycle arrest  
 GO:0031571 mitotic cell cycle G1/S transition DNA damage checkpoint

***Regulation of Endothelia and epithelial cell proliferation***

GO:0050679 positive regulation of epithelial cell proliferation  
 GO:0000904 cell morphogenesis involved in differentiation  
 GO:0001936 regulation of endothelial cell proliferation  
 GO:0001938 positive regulation of endothelial cell proliferation

***Response to insulin and hormone stimulus***

GO:0071375 cellular response to peptide hormone stimulus  
 GO:0032868 response to insulin stimulus  
 GO:0032869 cellular response to insulin stimulus  
 GO:0043627 response to estrogen stimulus

***Immune response***

GO:0045088 regulation of innate immune response  
 GO:0002757 immune response-activating signal transduction  
 GO:0002253 activation of immune response

***Vessel development***

GO:0001944 vasculature development  
 GO:0001568 blood vessel development  
 GO:0001525 angiogenesis  
 GO:0048514 blood vessel morphogenesis

***Telomere maintenance***

GO:0000723 telomere maintenance  
 GO:0032200 telomere organization  
 GO:0010833 telomere maintenance via telomere lengthening

---

**Table S5.10** Specific functions of Subnetwork X

---

***Regulation of protein metabolic process***

- GO:0051247 positive regulation of protein metabolic process
- GO:0032270 positive regulation of cellular protein metabolic process
- GO:0006520 cellular amino acid metabolic process

***Apoptosis and programmed cell death***

- GO:0043068 positive regulation of programmed cell death
- GO:0006916 anti-apoptosis
- GO:0006917 induction of apoptosis
- GO:0012502 induction of programmed cell death
  - positive regulation of cysteine-type endopeptidase activity involved in
- GO:0043280 apoptotic process
- GO:0008629 induction of apoptosis by intracellular signals

***Regulation of gene expression***

- GO:0010628 positive regulation of gene expression
- GO:0045944 positive regulation of transcription from RNA polymerase II promoter
- GO:0000122 negative regulation of transcription from RNA polymerase II promoter
- GO:0010629 negative regulation of gene expression

***Regulation of phosphorylation***

- GO:0031401 positive regulation of protein modification process
- GO:0042327 positive regulation of phosphorylation
- GO:0045937 positive regulation of phosphate metabolic process
- GO:0001934 positive regulation of protein phosphorylation

***Regulation of enzyme activity***

- GO:0051345 positive regulation of hydrolase activity
- GO:0000079 regulation of cyclin-dependent protein kinase activity
- GO:0052547 regulation of peptidase activity
- GO:0052548 regulation of endopeptidase activity
- GO:0006919 activation of caspase activity

***Mitotic cell cycle***

- GO:0000077 DNA damage checkpoint
- GO:0090068 positive regulation of cell cycle process
- GO:0000083 regulation of transcription involved in G1/S phase of mitotic cell cycle
- GO:0000080 G1 phase of mitotic cell cycle
- GO:0006260 DNA replication
- GO:0006284 base-excision repair
- GO:0006302 double-strand break repair
- GO:0006298 mismatch repair
- GO:0007050 cell cycle arrest
- GO:0007126 meiosis
- GO:0007127 meiosis I

***Telomere maintenance***

- GO:0000723 telomere maintenance
- GO:0032200 telomere organization

***Regulation of kinase cascade***



GO:0010740 positive regulation of intracellular protein kinase cascade

GO:0007243 intracellular protein kinase cascade

GO:0000165 MAPKKK cascade

***Inositol lipid-mediated signaling***

GO:0048017 inositol lipid-mediated signaling

***ATP metabolic process***

GO:0046034 ATP metabolic process

GO:0006200 ATP catabolic process

---

**Supplementary Table S6. Target genes (E2F1 and RB1) predictive results of the miR-17 family**

|          | 01_DT | 02_miRSV | 06_TS | 07_PITA | 08_mirT | 09_tarM | 10_miR |
|----------|-------|----------|-------|---------|---------|---------|--------|
| miR-17   | 128   | 746      | 0     | 1541    | 16      | 190     | 1418.5 |
|          | 979   | 1031     | 0     | 2036.5  | 274     | 563     | 0      |
| miR-20a  | 440   | 724      | 0     | 1491    | 39.5    | 235     | 1418.5 |
|          | 1633  | 1101     | 510.5 | 1993    | 295     | 749     | 0      |
| miR-20b  | 130   | 692      | 0     | 1496    | 38      | 197     | 1418.5 |
|          | 981   | 1057     | 579.5 | 1997.5  | 401     | 749     | 0      |
| miR-106a | 455   | 746      | 0     | 1541    | 16      | 257     | 1418.5 |
|          | 1939  | 1031     | 628.5 | 2036.5  | 274     | 765     | 0      |
| miR-106b | 441   | 672      | 0     | 1539    | 12      | 252     | 1418.5 |
|          | 1637  | 995      | 0     | 2000    | 429     | 640     | 0      |
| miR-93   | 128   | 690      | 0     | 1402    | 85      | 236     | 1418.5 |
|          | 980   | 1070.5   | 0     | 1934    | 451     | 440     | 0      |

Non-zero values means the genes were predicted as target genes of according miRNAs; The results of E2F1 and RB1 were in even and odd rows respectively; The full name of predictive algorithms can be find in supplementary table S8.

**Supplementary Table S7. Differential expression analysis of the miR-17 family and RB1 by SAM**

|                 | Gene ID | GEO profile | Score(d)   | Numerator (r) | Denominator (s+s0) | Fold Change | q-value(%) |
|-----------------|---------|-------------|------------|---------------|--------------------|-------------|------------|
| <b>miR-17</b>   | 42650   | GSE27705    | 1.70452191 | 0.755263158   | 0.443093841        | 1.687939456 | 4.174595   |
| <b>miR-106b</b> | 19582   | GSE27705    | 2.76738915 | 0.858947368   | 0.310381852        | 1.81371449  | 0          |
| <b>miR-106a</b> | 46801   | GSE27705    | 1.76117657 | 0.767         | 0.435504318        | 1.701727459 | 4.174595   |
| <b>miR-20a</b>  | 145845  | GSE27705    | 1.73238454 | 0.761315789   | 0.408893141        | 1.695035853 | 4.174595   |
| <b>miR-93</b>   | 30687   | GSE27705    | 3.76611269 | 1.184526316   | 0.314522271        | 2.27288756  | 0          |
| <b>RB1</b>      | 5925    | GSE11969    | 2.39500027 | 0.110474348   | 0.046127071        | 1.079583138 | 3.68302739 |
|                 | 5925    | GSE2088     | 1.34337294 | 0.561158588   | 0.417723606        | 1.475453637 | 5.0241278  |

**Supplementary Table S8.** List of miRNA-target relation predictive algorithms and databases used in our work.

| Algorithm name | Abbr            | Version             | Website                                                                                                                     | Reference |
|----------------|-----------------|---------------------|-----------------------------------------------------------------------------------------------------------------------------|-----------|
| DIANA-microT   | 01_DT           | V3.0                | <a href="http://diana.cslab.ece.ntua.gr/microT/">http://diana.cslab.ece.ntua.gr/microT/</a>                                 | [1,2]     |
| mirSVR         | 02_miRS<br>V    | 2010.8              | <a href="http://www.microrna.org/microrna/getDownloads.do">http://www.microrna.org/microrna/getDownloads.do</a>             | [3]       |
| PicTar5        | 03_PT5          | 2007                | <a href="http://pictar.mdc-berlin.de/">http://pictar.mdc-berlin.de/</a>                                                     | [4]       |
| RNA22          | 04_R3/05<br>_R5 | 2006                | <a href="http://cbcsrv.watson.ibm.com/rna22.html">http://cbcsrv.watson.ibm.com/rna22.html</a>                               | [5]       |
| RNAhybrid      | 05_Rh           | 2004                | <a href="http://bibiserv.techfak.uni-bielefeld.de/rnahybrid/">http://bibiserv.techfak.uni-bielefeld.de/rnahybrid/</a>       | [6]       |
| TargetScan     | 06_TS           | 5.2                 | <a href="http://www.targetscan.org/">http://www.targetscan.org/</a>                                                         | [7,8]     |
| PITA           | 07_PITA         | version 6<br>(08.8) | <a href="http://genie.weizmann.ac.il/pubs/mir07/mir07_data.html">http://genie.weizmann.ac.il/pubs/mir07/mir07_data.html</a> | [9]       |
| MirTarget2     | 08_mirT         | 2009.4              | <a href="http://mirdb.org/miRDB/">http://mirdb.org/miRDB/</a>                                                               | [10,11]   |
| TargetMiner    | 09_tarM         | 2009                | <a href="http://www.isical.ac.in/~bioinfo_miu/targetminer20.htm">http://www.isical.ac.in/~bioinfo_miu/targetminer20.htm</a> | [12]      |
| miRanda        | 10_miR          | 2010.8              | <a href="http://www.microrna.org/microrna/getDownloads.do">http://www.microrna.org/microrna/getDownloads.do</a>             | [13,14]   |

1. Maragkakis M, Alexiou P, Papadopoulos GL, Reczko M, Dalamagas T, Giannopoulos G, Goumas G, Koukis E, Kourtis K, Simossis VA, et al. 2009 Accurate microRNA target prediction correlates with protein repression levels. *BMC Bioinformatics* **10**, 295.
2. Maragkakis M, Reczko M, Simossis VA, Alexiou P, Papadopoulos GL, Dalamagas T, Giannopoulos G, Goumas G, Koukis E, Kourtis K, et al. 2009 DIANA-microT web server: elucidating microRNA functions through target prediction. *Nucleic Acids Res* **37**, W273-276.
3. Betel D, Koppal A, Agius P, Sander C, Leslie C. 2010 Comprehensive modeling of microRNA targets predicts functional non-conserved and non-canonical sites. *Genome Biol* **11**, R90.
4. Krek A, Grun D, Poy MN, Wolf R, Rosenberg L, Epstein EJ, MacMenamin P, da Piedade I, Gunsalus KC, Stoffel M, et al. 2005 Combinatorial microRNA target predictions. *Nat Genet* **37**, 495-500.
5. Miranda KC, Huynh T, Tay Y, Ang YS, Tam WL, Thomson AM, Lim B, Rigoutsos I. 2006 A pattern-based method for the identification of MicroRNA binding sites and their corresponding heteroduplexes. *Cell* **126**, 1203-1217.

6. Rehmsmeier M, Steffen P, Hochsmann M, Giegerich R. 2004 Fast and effective prediction of microRNA/target duplexes. *RNA* **10**, 1507-1517.
7. Lewis BP, Shih IH, Jones-Rhoades MW, Bartel DP, Burge CB. 2003 Prediction of mammalian microRNA targets. *Cell* **115**, 787-798.
8. Lewis BP, Burge CB, Bartel DP. 2005 Conserved seed pairing, often flanked by adenosines, indicates that thousands of human genes are microRNA targets. *Cell* **120**, 15-20.
9. Kertesz M, Iovino N, Unnerstall U, Gaul U, Segal E. 2007 The role of site accessibility in microRNA target recognition. *Nat Genet* **39**, 1278-1284.
10. Wang X, El Naqa IM. 2008 Prediction of both conserved and nonconserved microRNA targets in animals. *Bioinformatics* **24**, 325-332.
11. Wang X. 2008 miRDB: a microRNA target prediction and functional annotation database with a wiki interface. *RNA* **14**, 1012-1017.
12. Bandyopadhyay S, Mitra R. 2009 TargetMiner: microRNA target prediction with systematic identification of tissue-specific negative examples. *Bioinformatics* **25**, 2625-2631.
13. John B, Enright AJ, Aravin A, Tuschl T, Sander C, Marks DS. 2004 Human MicroRNA targets. *PLoS Biol* **2**, e363.
14. Enright AJ, John B, Gaul U, Tuschl T, Sander C, Marks DS. 2003 MicroRNA targets in *Drosophila*. *Genome Biol* **5**, R1.

Supplementary Figure S1 to S10. miRNA-TF synergetic regulatory subnetwork I to X in order.

Figure S1. Subnetwork I

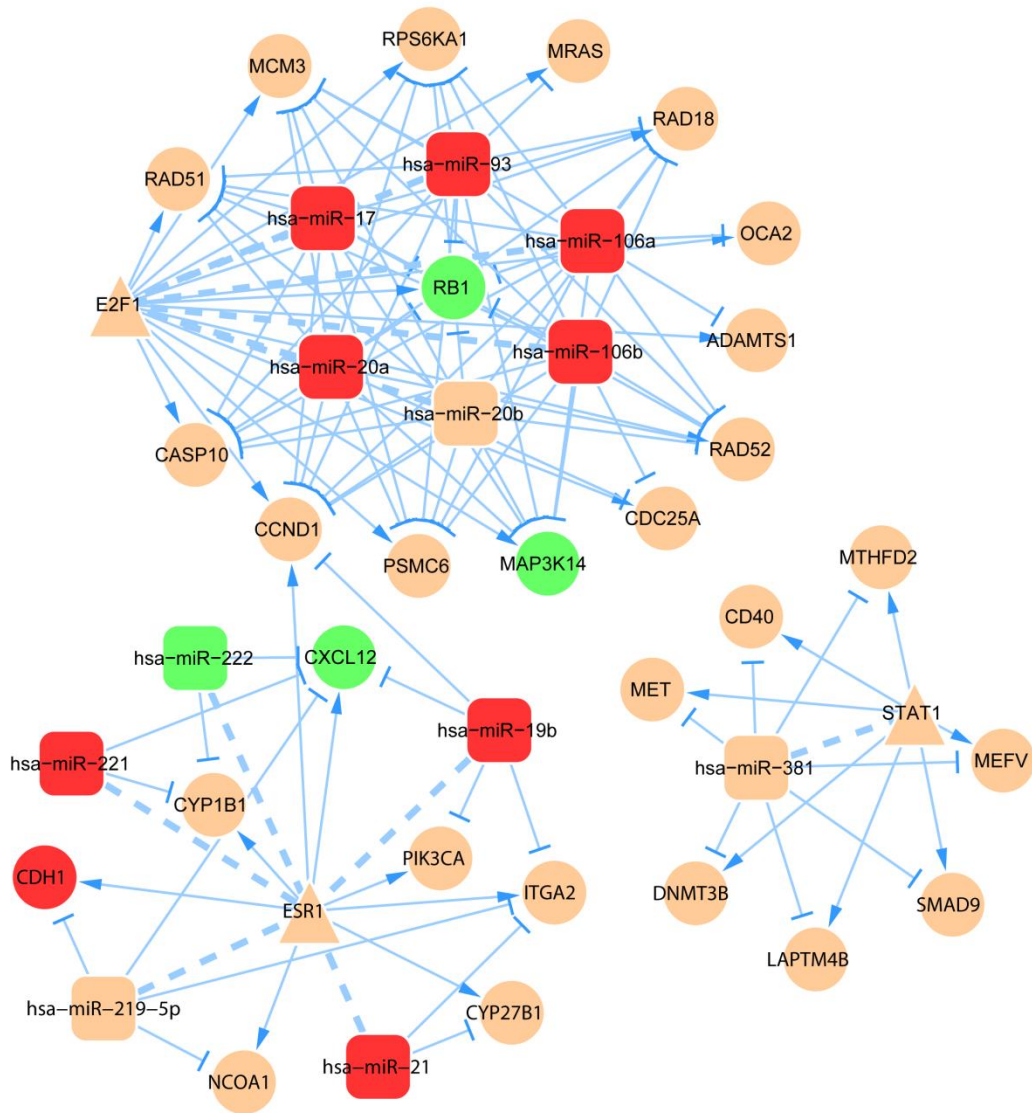

Figure S2. Subnetwork II

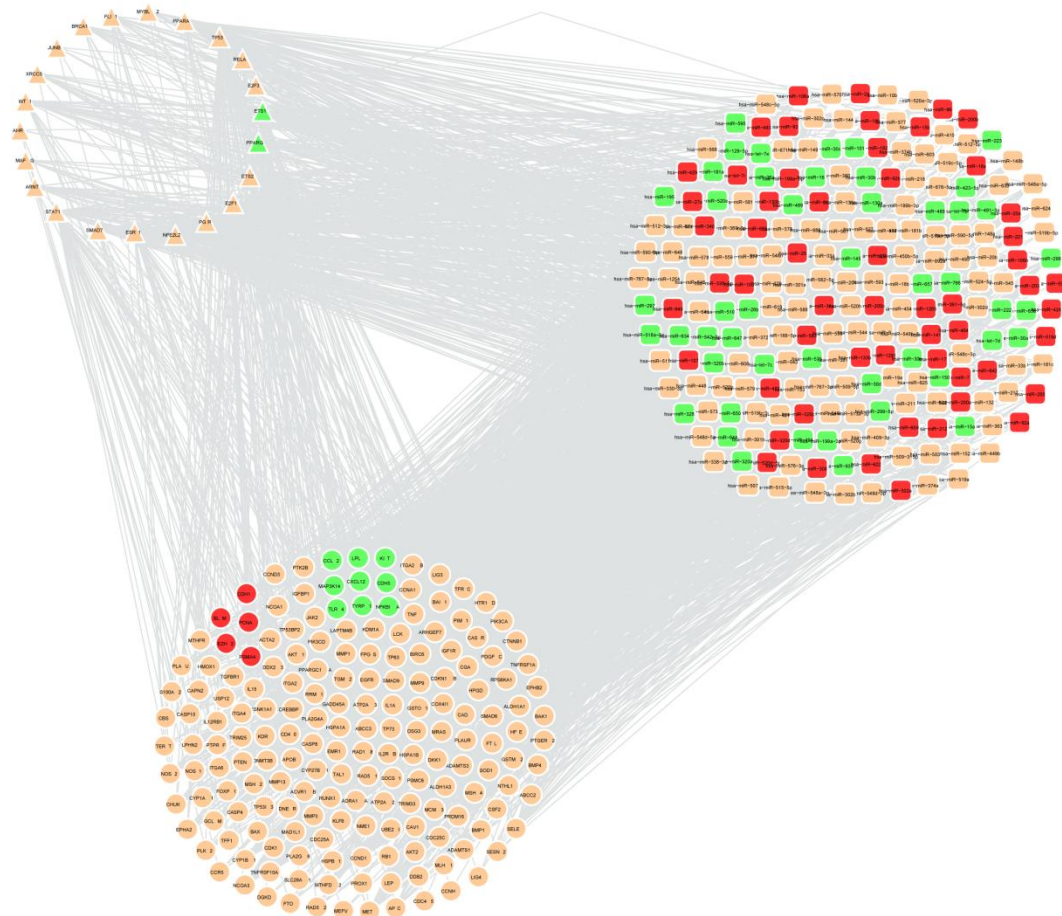







Figure S5. Subnetwork V

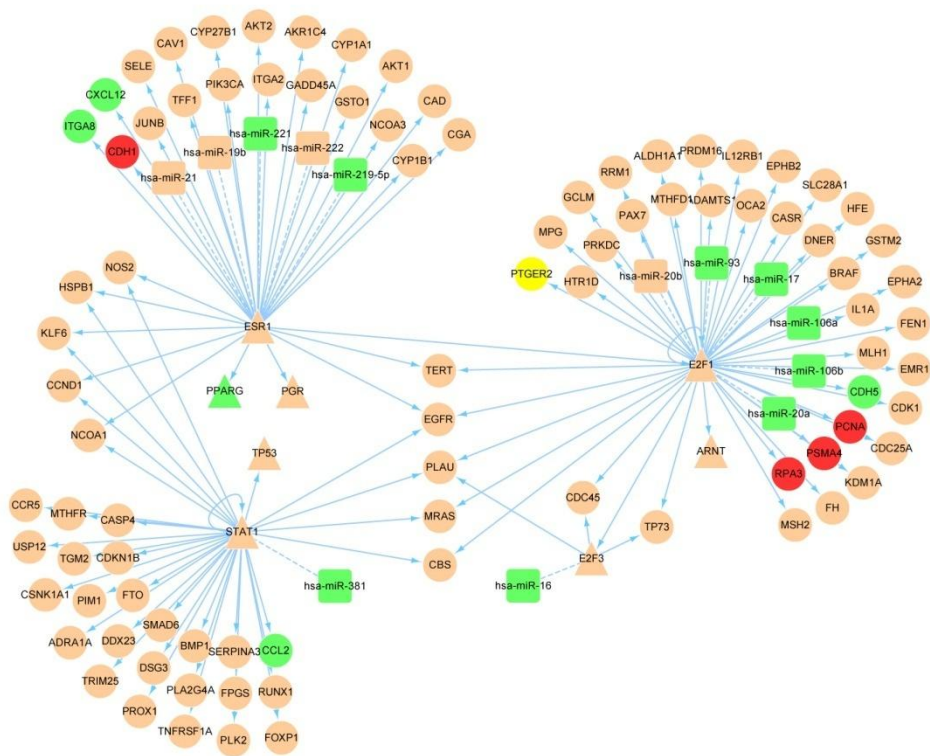

Figure S6. Subnetwork VI

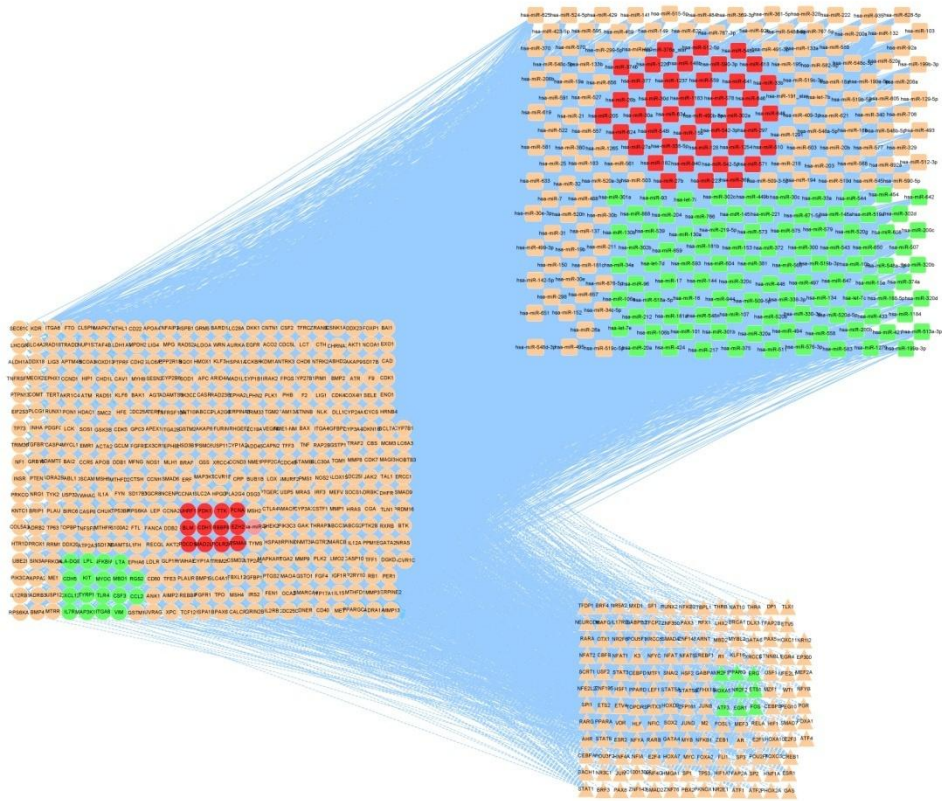

Figure S7. Subnetwork VII

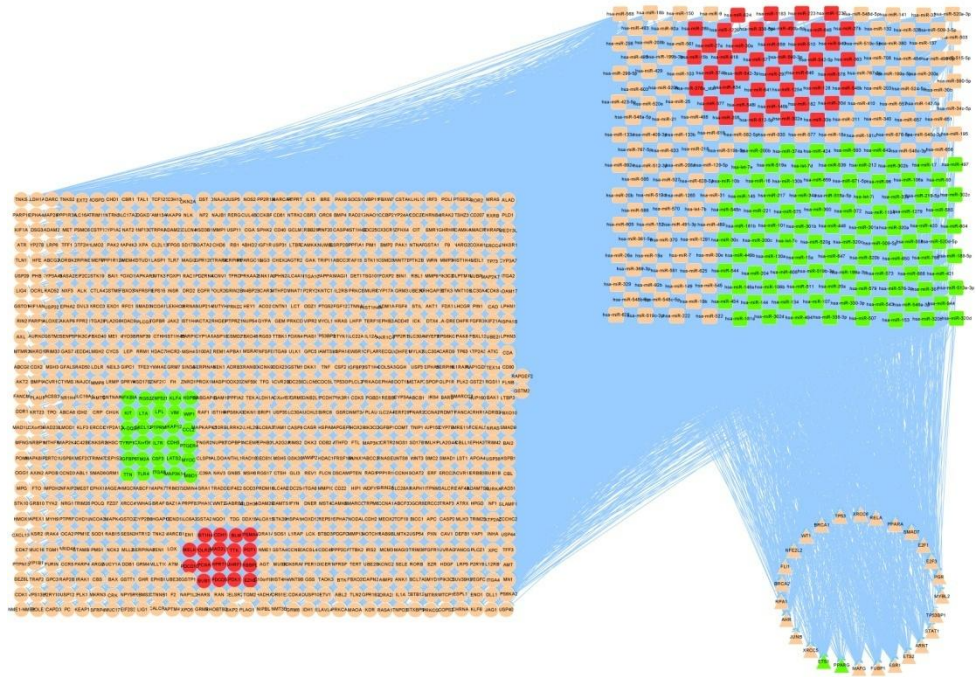



Figure S9. Subnetwork IX

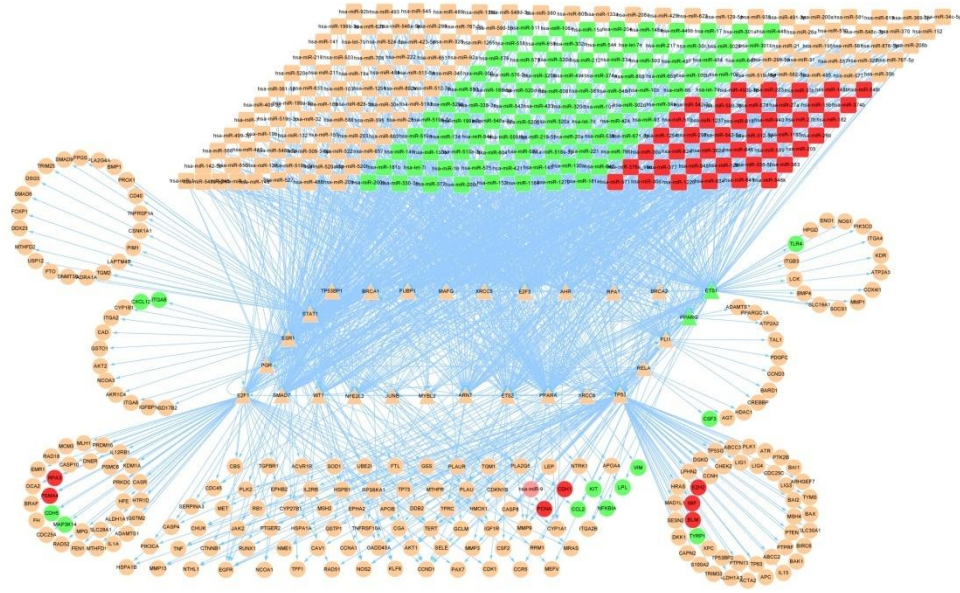

Figure S10. Subnetwork X

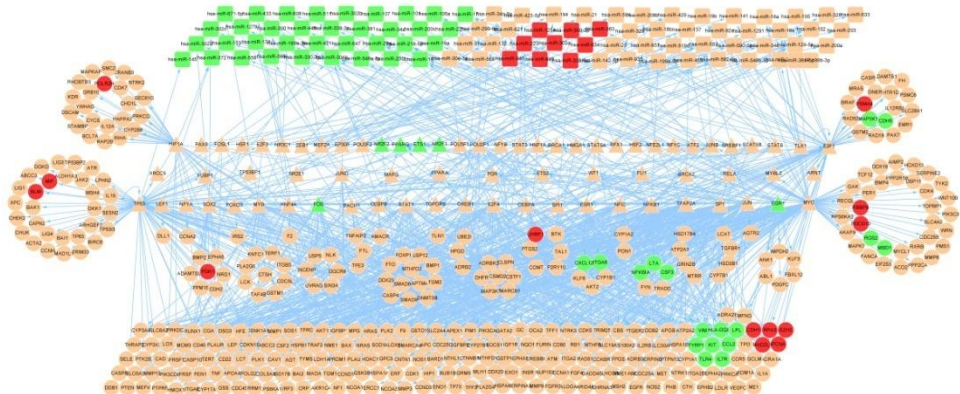

Ellipse nodes: Genes; round rectangle nodes: miRNAs; triangle nodes: TFs. Green nodes: down-regulated nodes; red nodes: up-regulated nodes. Arrow shape edge: transcriptional activation/repression; T shape dege: miRNA repression. Dash line: a feedback loop.

**Figure S11.** Box plots of nodes incoming degree and outgoing degree. of Gene, miRNA and TF (A) Incoming degree of miRNA, TF and gene; (B) Outgoing degree of miRNA and TF.

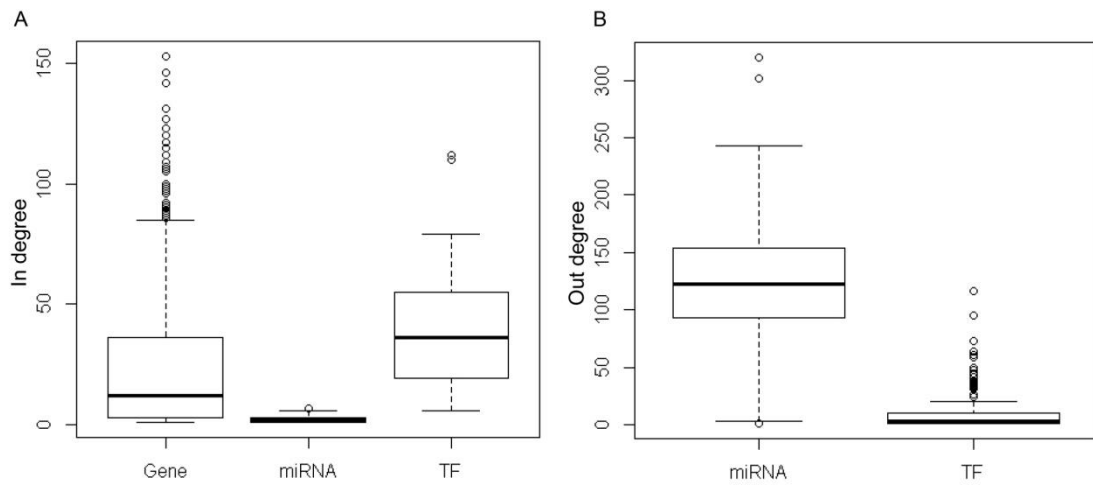

**Supplementary Note.** multiple sequence alignment of miR-17 family (from 3' to 5') and 3'-UTR region of E2F1 conserved sequences(from 5' to 3')

```
miR-106a      AAAAGUGCUUACAGUGCAGGUAG 23
miR-106b      UAAAGUGCUGACAGUGCAGAU-- 21
miR-20a       UAAAGUGCUUAAUAGUGCAGGUAG 23
miR-17        CAAAGUGCUUACAGUGCAGGUAG 23
miR-20b       CAAAGUGCUCAUAGUGCAGGUAG 23
miR-93        CAAAGUGCUGUUCGUGCAGGUAG 23
                *****      ***** *
```

```
gi|189217864|ref|NM_001100778.1| Rattus norvegicus E2F transcription factor 1 (E2f1), mRNA
gi|158517881|ref|NM_007891.4| Mus musculus E2F transcription factor 1 (E2f1), mRNA
gi|329663320|ref|NM_001206079.1| Bos taurus E2F transcription factor 1 (E2F1), mRNA
gi|168480109|ref|NM_005225.2| Homo sapiens E2F transcription factor 1 (E2F1), mRNA
gi|332858149|ref|XM_003316862.1| PREDICTED: Pan troglodytes E2F transcription factor 1 (E2F1), mRNA
```

```
miR-17      -----gauggacgugacauucgugaaac-----
                ||| | |||| | | |
gi|189217864|ref|NM_001100778.1| ugggcucuaacagcacuuuugguguccuugcugcagggg
gi|332858149|ref|XM_003316862.1| ggggcucuaacugcacuuucggccuuuugcucuggggg
gi|329663320|ref|NM_001206079.1| ggggcucuaacugcacuuuuggucuuucugcucagggg
gi|168480109|ref|NM_005225.2| ggggcucuaacugcacuuucggccuuuugcucuggggg
gi|158517881|ref|NM_007891.4| ugggcucuaacugcacuuuugguguccuugcugcagggg
```

```
miR-106a    -----gauggacgugacauucgugaaaa-----
                ||| | |||| | | |
gi|189217864|ref|NM_001100778.1| ugggcucuaacagcacuuuugguguccuugcugcagggg
gi|332858149|ref|XM_003316862.1| ggggcucuaacugcacuuucggccuuuugcucuggggg
gi|329663320|ref|NM_001206079.1| ggggcucuaacugcacuuuuggucuuucugcucagggg
gi|168480109|ref|NM_005225.2| ggggcucuaacugcacuuucggccuuuugcucuggggg
gi|158517881|ref|NM_007891.4| ugggcucuaacugcacuuuugguguccuugcugcagggg
```

```
miR-106b    -----uagacgugacagucgugaaau-----
                | | |||| | | |
gi|189217864|ref|NM_001100778.1| gugggcucuaacagcacuuuugguguccuugcugcaggg
gi|332858149|ref|XM_003316862.1| -ggggcucuaacugcacuuucggccuuuugcucugggg
gi|329663320|ref|NM_001206079.1| ggggcucuaacugcacuuuuggucuuucugcucaggg
gi|168480109|ref|NM_005225.2| -ggggcucuaacugcacuuucggccuuuugcucugggg
gi|158517881|ref|NM_007891.4| gugggcucuaacugcacuuuugguguccuugcugcaggg
```

```
miR-20a     -----gauggacgugauauucgugaaau-----
                ||| | |||| | | |
gi|189217864|ref|NM_001100778.1| ugggcucuaacagcacuuuugguguccuugcugcagggg
gi|332858149|ref|XM_003316862.1| ggggcucuaacugcacuuucggccuuuugcucuggggg
gi|329663320|ref|NM_001206079.1| ggggcucuaacugcacuuuuggucuuucugcucagggg
gi|168480109|ref|NM_005225.2| ggggcucuaacugcacuuucggccuuuugcucuggggg
```

```

gi | 158517881 | ref | NM_007891. 4 |          ugggcucuaacugcacuuuugguguccuugcugcagggg

miR-20b          -----gauggacgugauacucgugaaac-----
                ||| | |||| | | |
gi | 189217864 | ref | NM_001100778. 1 |          ugggcucuaacagcacuuuugguguccuugcugcagggg
gi | 332858149 | ref | XM_003316862. 1 |          ggggcucuaacugcacuuucggccuuuugcucuggggg
gi | 329663320 | ref | NM_001206079. 1 |          ggggcucuaacugcacuuuuggucuuuugcucagggg
gi | 168480109 | ref | NM_005225. 2 |          ggggcucuaacugcacuuucggccuuuugcucuggggg
gi | 158517881 | ref | NM_007891. 4 |          ugggcucuaacugcacuuuugguguccuugcugcagggg

miR-93          -----gauggacgugcuu-----
                ||| | |||
gi | 189217864 | ref | NM_001100778. 1 |          ugggcucuaacagcacuuuugguguccuugcugcagggg
gi | 332858149 | ref | XM_003316862. 1 |          ggggcucuaacugcacuuucggccuuuugcucuggggg
gi | 329663320 | ref | NM_001206079. 1 |          ggggcucuaacugcacuuuuggucuuuugcucagggg
gi | 168480109 | ref | NM_005225. 2 |          ggggcucuaacugcacuuucggccuuuugcucuggggg
gi | 158517881 | ref | NM_007891. 4 |          ugggcucuaacugcacuuuugguguccuugcugcagggg

```

1. Maragkakis M, Alexiou P, Papadopoulos GL, Reczko M, Dalamagas T, et al. (2009) Accurate microRNA target prediction correlates with protein repression levels. *BMC Bioinformatics* 10: 295.
2. Maragkakis M, Reczko M, Simossis VA, Alexiou P, Papadopoulos GL, et al. (2009) DIANA-microT web server: elucidating microRNA functions through target prediction. *Nucleic Acids Res* 37: W273-276.
3. Betel D, Koppal A, Agius P, Sander C, Leslie C (2010) Comprehensive modeling of microRNA targets predicts functional non-conserved and non-canonical sites. *Genome Biol* 11: R90.
4. Krek A, Grun D, Poy MN, Wolf R, Rosenberg L, et al. (2005) Combinatorial microRNA target predictions. *Nat Genet* 37: 495-500.
5. Miranda KC, Huynh T, Tay Y, Ang YS, Tam WL, et al. (2006) A pattern-based method for the identification of MicroRNA binding sites and their corresponding heteroduplexes. *Cell* 126: 1203-1217.
6. Rehmsmeier M, Steffen P, Hochsmann M, Giegerich R (2004) Fast and effective prediction of microRNA/target duplexes. *RNA* 10: 1507-1517.
7. Lewis BP, Shih IH, Jones-Rhoades MW, Bartel DP, Burge CB (2003) Prediction of mammalian microRNA targets. *Cell* 115: 787-798.
8. Lewis BP, Burge CB, Bartel DP (2005) Conserved seed pairing, often flanked by adenosines, indicates that thousands of human genes are microRNA targets. *Cell* 120: 15-20.
9. Kertesz M, Iovino N, Unnerstall U, Gaul U, Segal E (2007) The role of site accessibility in microRNA target recognition. *Nat Genet* 39: 1278-1284.
10. Wang X, El Naqa IM (2008) Prediction of both conserved and nonconserved microRNA targets in animals. *Bioinformatics* 24: 325-332.
11. Wang X (2008) miRDB: a microRNA target prediction and functional annotation database with a wiki interface. *RNA* 14: 1012-1017.
12. Bandyopadhyay S, Mitra R (2009) TargetMiner: microRNA target prediction with systematic identification of tissue-specific negative examples. *Bioinformatics* 25: 2625-2631.
13. John B, Enright AJ, Aravin A, Tuschl T, Sander C, et al. (2004) Human MicroRNA targets. *PLoS Biol* 2:



e363.

14. Enright AJ, John B, Gaul U, Tuschl T, Sander C, et al. (2003) MicroRNA targets in Drosophila. *Genome Biol* 5: R1.
