# Supplementary material for: Functional analysis of microRNA and transcription factor synergistic regulatory network based on identifying regulatory motifs in non-small cell lung cancer
Source: Springer Nature journal article supplement (doi:10.1186/1752-0509-7-122), 2013-11-07

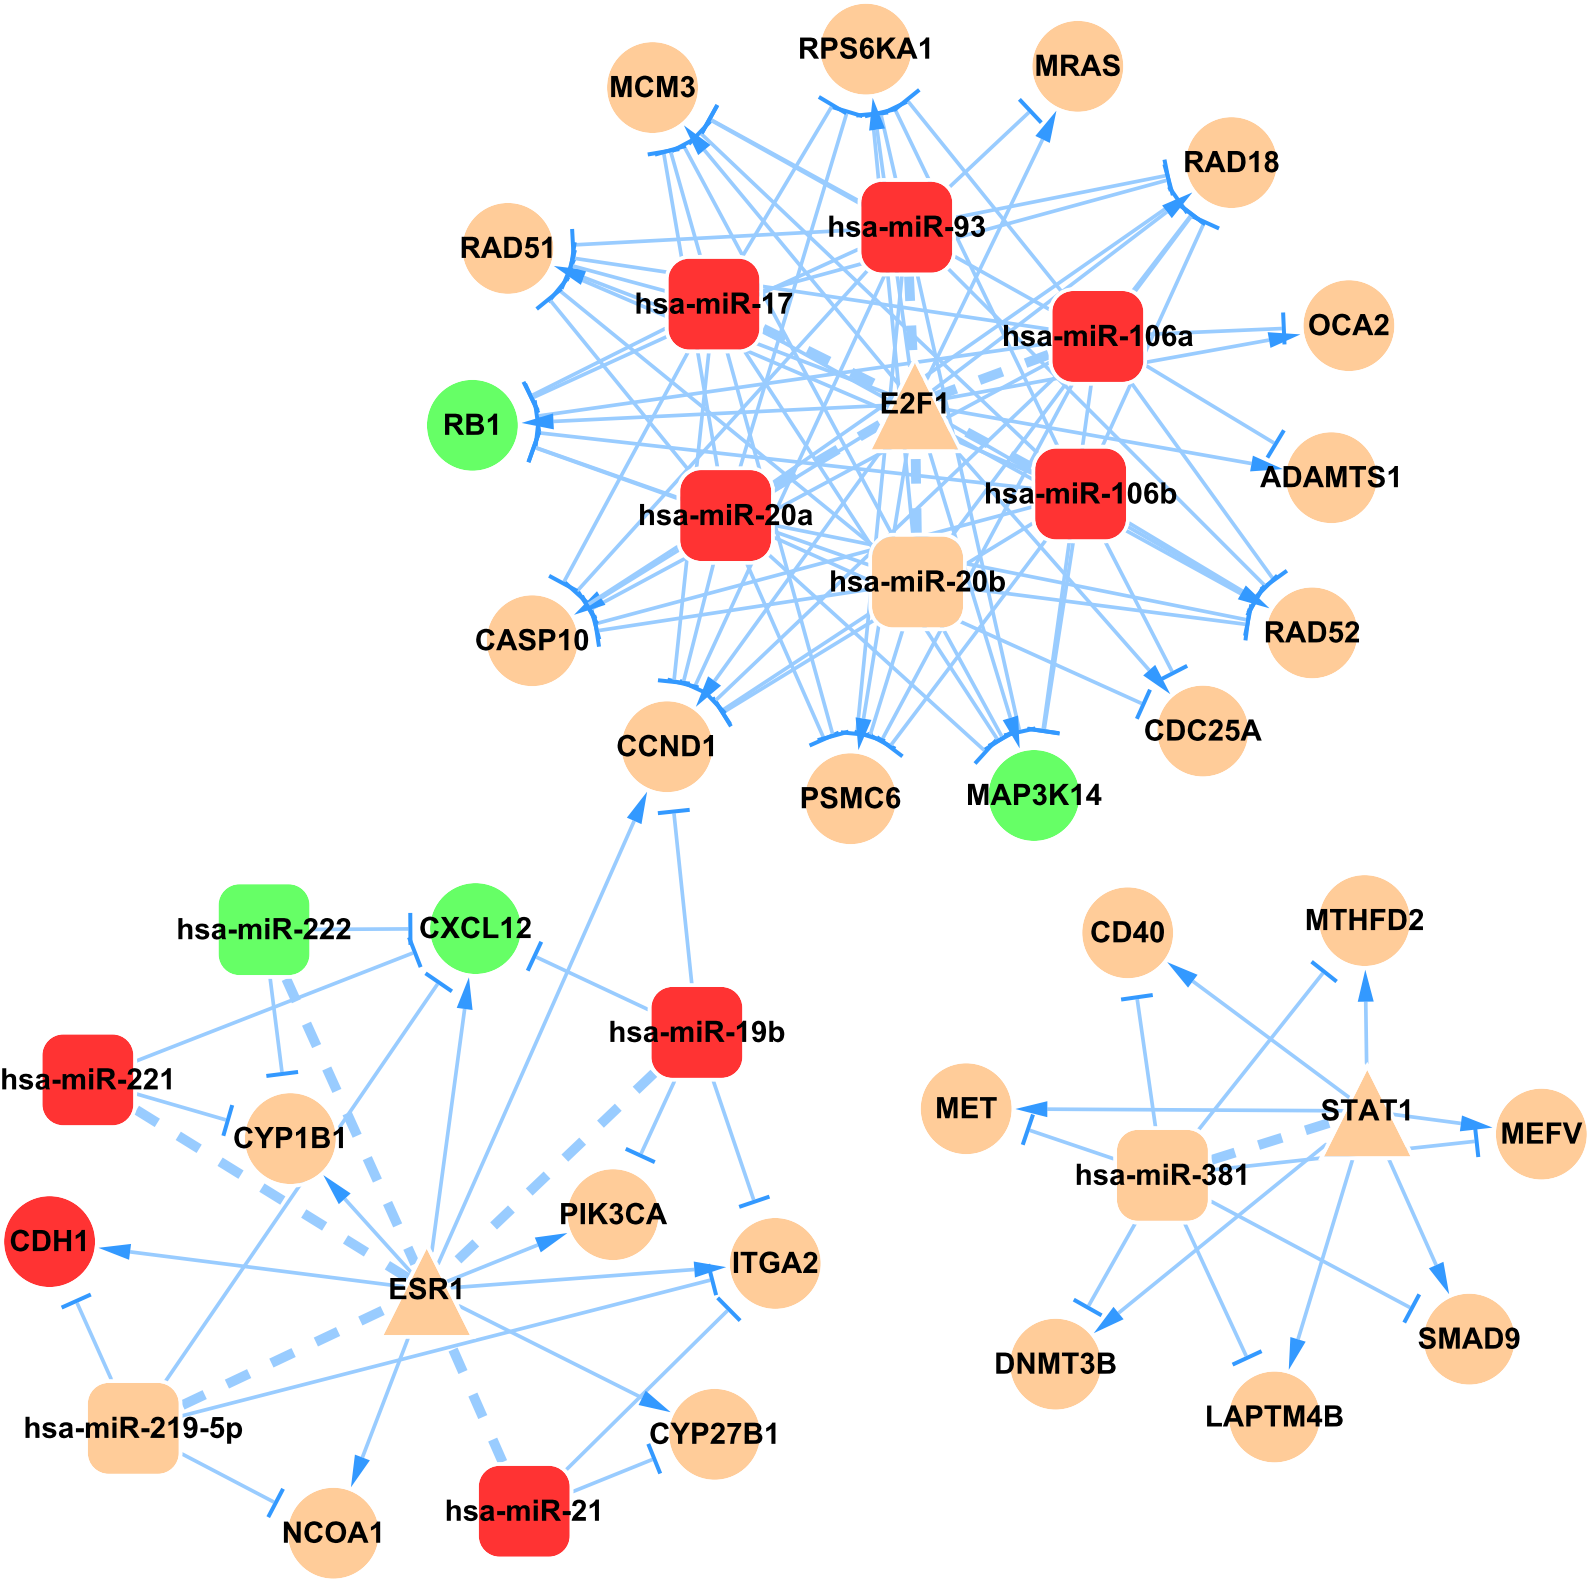

Supplement: 12918_2013_1444_MOESM5_ESM.pdf [file 12918_2013_1444_MOESM5_ESM.pdf]
